# Supplementary material
Source: publisher site journal article supplement (https://www.spandidos-publications.com/591/downloadSupplementary)

Figure S1. Prediction interaction between hsa\_circRNA\_102459/hsa\_circRNA\_043621 and their miRNAs.

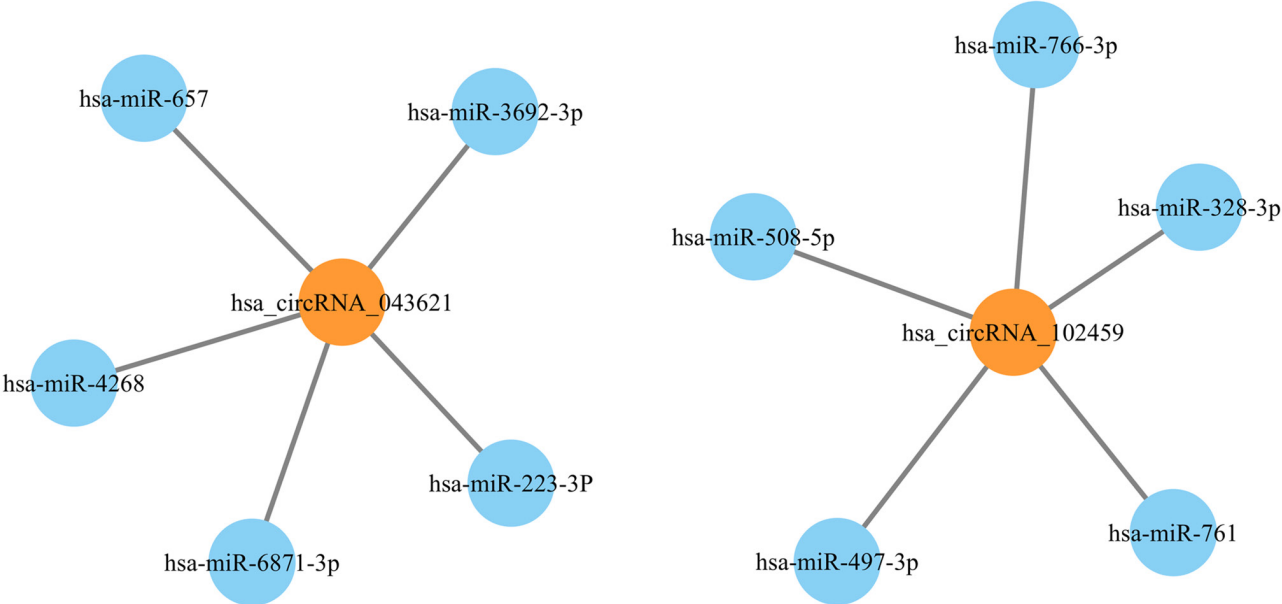

Figure S2. Overexpression of circ\_102459 and knockdown of circ\_043621 did not alter expression of their parental genes, *KRT14* and *MAST1*, individually. *KRT14*, keratin 14; *MAST1*, microtubule associated serine/threonine kinase 1; NS, not significant.

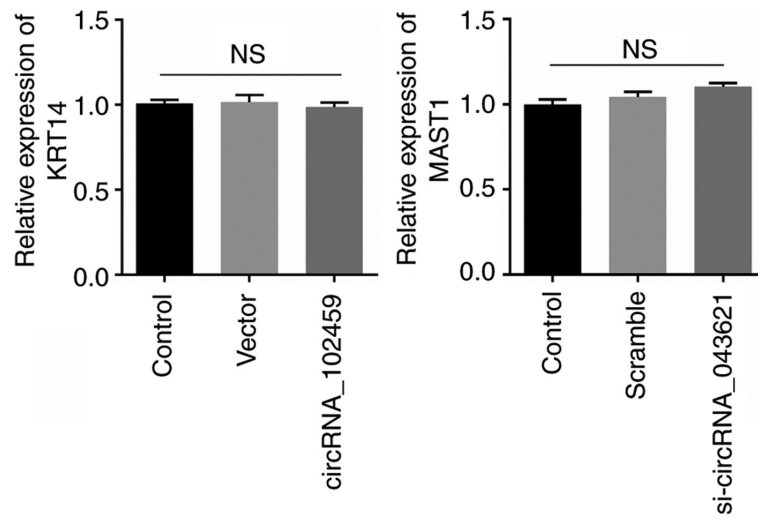

Supplement: Supplementary file 1 [file downloadSupplementary]
